# Supplementary material
Source: Research Square preprint supplement (doi:10.21203/rs.3.rs-9678471/v1)
Supplement: Supplementary file 1 [file 8273360e7495cd4dfbcdaba5.docx]

| geneID | gene name |
| --- | --- |
| evm.model.Chr13.962 | CAT |
| evm.model.Chr21.164.1 | PDIA6 |
| evm.model.contig000761F.7 | HYOU1 |
| evm.model.Chr19.507 | PDIA4 |
| evm.model.Chr12.43 | SOD1 |
| evm.model.Chr3.920 | HSD17B4 |
| evm.model.Chr20.631 | DECR2 |
| evm.model.Chr5.235 | PRDX2 |
| evm.model.Chr12.920 | AIFM |
| evm.model.Chr13.819 | HSP90B1 |
| evm.model.Chr15.335 | PRDX1 |
| evm.model.Chr15.159 | DAD1 |

Tab.3 Potential Proteins Interacting with DUSP5
